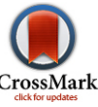

# Sources of Heavy Metals in Surface Sediments and an Ecological Risk Assessment from Two Adjacent Plateau Reservoirs

Binbin Wu<sup>1</sup>, Guoqiang Wang<sup>1\*</sup>, Jin Wu<sup>1</sup>, Qing Fu<sup>2</sup>, Changming Liu<sup>1</sup>

<sup>1</sup> College of Water Sciences, Beijing Normal University, Key Laboratory of Water and Sediment Sciences, Ministry of Education, Beijing, China, <sup>2</sup> Chinese Research Academy of Environmental Sciences, Beijing, China

## Abstract

The concentrations of heavy metals (mercury (Hg), cadmium (Cd), lead (Pb), chromium (Cr), copper (Cu) and arsenic (As)) in surface water and sediments were investigated in two adjacent drinking water reservoirs (Hongfeng and Baihua Reservoirs) on the Yunnan-Guizhou Plateau in Southwest China. Possible pollution sources were identified by spatial and statistical analyses. For both reservoirs, Cd was most likely from industrial activities, and As was from lithogenic sources. For the Hongfeng Reservoir, Pb, Cr and Cu might have originated from mixed sources (traffic pollution and residual effect of former industrial practices), and the sources of Hg included the inflows, which were different for the North (industrial activities) and South (lithogenic origin) Lakes, and atmospheric deposition resulting from coal combustion. For the Baihua Reservoir, the Hg, Cr and Cu were primarily derived from industrial activities, and the Pb originated from traffic pollution. The Hg in the Baihua Reservoir might also have been associated with coal combustion pollution. An analysis of ecological risk using sediment quality guidelines showed that there were moderate toxicological risks for sediment-dwelling organisms in both reservoirs, mainly from Hg and Cr. Ecological risk analysis using the Hakanson index suggested that there was a potential moderate to very high ecological risk to humans from fish in both reservoirs, mainly because of elevated levels of Hg and Cd. The upstream Hongfeng Reservoir acts as a buffer, but remains an important source of Cd, Cu and Pb and a moderately important source of Cr, for the downstream Baihua Reservoir. This study provides a replicable method for assessing aquatic ecosystem health in adjacent plateau reservoirs.

**Citation:** Wu B, Wang G, Wu J, Fu Q, Liu C (2014) Sources of Heavy Metals in Surface Sediments and an Ecological Risk Assessment from Two Adjacent Plateau Reservoirs. PLoS ONE 9(7): e102101. doi:10.1371/journal.pone.0102101

**Editor:** Jonathan H. Freedman, NIEHS/NIH, United States of America

**Received:** February 1, 2014; **Accepted:** June 13, 2014; **Published:** July 10, 2014

**Copyright:** © 2014 Wu et al. This is an open-access article distributed under the terms of the Creative Commons Attribution License, which permits unrestricted use, distribution, and reproduction in any medium, provided the original author and source are credited.

**Funding:** This research was supported by Beijing Higher Education Young Elite Teacher Project (Grant No. YETP0275), the Program for New Century Excellent Talents in University (Grant No. NCET-12-0058) and the Fundamental Research Funds for the Central Universities (Grant No. 2012LZD10). The funders had no role in study design, data collection and analysis, decision to publish, or preparation of the manuscript.

**Competing Interests:** The authors have declared that no competing interests exist.

\* Email: wangqg@bnu.edu.cn

## Introduction

There is worldwide concern about heavy metal contamination because of the environmental persistence of these elements, biogeochemical recycling and the ecological risks that metals present [1,2]. Large numbers of anthropogenically generated heavy metals from urban areas, agricultural areas and industrial sites are discharged into aquatic environments where they are transported in the water column, accumulated in sediment, and biomagnified through the food chain [3], resulting in significant ecological risk to benthic organisms, fish and humans [4]. Sediments are the main sink for heavy metals in aquatic environments [5], and sediment quality has been recognized as an important indicator of water pollution [6]. However, heavy metals are not permanently bound to sediments [7], and they may be released into the water column when the environmental conditions change (e.g., temperature and pH) or when sediments undergo other physical or biological disturbances [8]. Furthermore, reservoir construction generally leads to an increase in residence time, resulting in high accumulations of heavy metals in sediments. Consequently, it is important to analyze sediments from

reservoirs for heavy metals to support environmental management, particularly for sediments from drinking water reservoirs.

Understanding the sources of pollutants in aquatic sediments is important for pollution control. Statistical approaches, such as Pearson correlation analysis, principal components analysis (PCA), and cluster analysis, are considered to be effective tools for uncovering pollution sources and have been used successfully in many studies of heavy metal pollution in sediments [1,2,3,7,9,10,11]. Risk assessments of the environmental pollution are also critical for sediment analysis. The ecological risk of heavy metals in sediments differs for different receptors (e.g., sediment-dwelling organisms, fish or humans). The thresholds in sediment quality guidelines (SQGs) have been used to evaluate the potential adverse effects of heavy metals on sediment-dwelling organisms in freshwater systems [12,13,14,15]. However, few SQGs have been developed to assess the adverse effects of heavy metals in sediment on higher trophic levels (fish or other wildlife) [16,17]. The potential ecological risk index proposed by Hakanson [18] is based on heavy metal concentrations in sediment, and it is the simplest and most popular method for assessing the human health risk from fish consumption.

The rapid growth of urbanization and industrial development has resulted in increasing heavy metal pollution in the aquatic sediment of the Yunnan-Guizhou Plateau [11,19]. Several cascade hydropower stations have been built along the region's large rivers (e.g., Wujiang, Jinshajiang and Nanpanjiang) since the 1950s, and stations are still being built for electricity production today, leading to a continuous series of reservoirs along the rivers [20]. Previous studies have evaluated the carbon (C) cycle [21,22] and the mercury (Hg) balance [20,23] in adjacent plateau reservoirs, and have demonstrated how upstream reservoirs influence downstream reservoirs. However, little research has been conducted on other heavy metals in the adjacent reservoirs on this plateau. In addition, several decades after their construction, the functions of these reservoirs were changed, so they now supply drinking water to the human population, which has grown rapidly due to economic growth. Currently, these reservoirs are the main drinking water sources on the Yunnan-Guizhou Plateau. Although some pollution sources were closed or moved when the reservoir functions were changed, the residue of previous pollutants still remains in reservoir sediments. Furthermore, the Yunnan-Guizhou Plateau is famous for its karst landforms, and the hydrogen carbonate ( $\text{HCO}_3^-$ ) concentration and pH are both high in the aquatic environment [24,25,26]. The alkaline environment favors heavy metal accumulation in sediment [27], while the karst landform promotes interactions between groundwater and surface water through fractures (sinkholes, conduits and caves) or carbonate bedrock [26,28,29]. These interactions can complicate heavy metal transport and increase the ecological risk of secondary pollution. Therefore, it is important and necessary to investigate the heavy metal pollution and to assess the associated pollution sources and ecological risks from reservoir sediments on the Yunnan-Guizhou Plateau, particularly for drinking water reservoirs. The objectives of this paper are to (1) identify the pollution sources of heavy metals in the sediment from two adjacent drinking water reservoirs on the Yunnan-Guizhou Plateau, (2) estimate the associated ecological risk by considering different receptors, and (3) discuss the influence of upstream reservoirs (as buffers or sources of heavy metals) on downstream reservoirs.

## Materials and Methods

### Study Areas

The Hongfeng and Baihua Reservoirs are two adjacent reservoirs on the Yunnan-Guizhou plateau, just northwest of Guiyang City, the capital of Guizhou Province, Southwest China (Fig. 1). These two reservoirs were constructed on the main channel of the Maotiao River, a branch of the Wujiang River in the Yangtze River Basin, in 1958 and 1960, respectively. The Maotiao River was one of the first rivers to be used for cascade hydropower in China. The Hongfeng is the first reservoir and the Baihua is the second of seven cascade hydropower stations along the Maotiao River. The Hongfeng Reservoir covers a water surface area of 57.2 km<sup>2</sup>, while the Baihua Reservoir covers an area of 14.5 km<sup>2</sup>. Both reservoirs are very deep, with each having a maximum depth of approximately 45 m. The Hongfeng Reservoir consists of the North and South Lakes (which have different flow directions, Fig. 1), and has five main inflows, two into the North Lake and three into the South Lake. The Maotiao River is the only outlet of the Hongfeng Reservoir, and also serves as the major inlet of the Baihua Reservoir. The Baihua Reservoir has eight additional minor inflows and one outlet. For their first 30 years, the reservoirs were mainly used for electricity generation and flood control. During this period, as industry, agriculture, tourism and fishery production were established and developed in

the basin, the water quality in both reservoirs declined. However, because of an increasing demand for water through the 1990s, the two reservoirs were designated as drinking water sources for Guiyang City. The major function of both reservoirs was changed to drinking water supply in 2000, at which point the government strengthened their environmental protection. The pollution sources have gradually decreased, but the sediments may still hold residue from earlier pollution.

Heavy metal pollution is one of the most prominent environmental problems in the study reservoirs, mainly owing to intense anthropogenic activities. Figure 2 shows the distribution of main point sources in Hongfeng and Baihua Reservoirs basin from the first China pollution source census in 2008 (provided by the Guiyang Research Academy of Environmental Sciences). There are many mining, smelting, mechanical manufacture, chemical and other industries (e.g., building material, food and pharmaceutical factories) in the catchment area of the Hongfeng Reservoir (1596 km<sup>2</sup>), which are major sources of heavy metals (Fig. 2). There is also a large coal-fired power plant (300 MW) situated on the southeast bank of the Hongfeng Reservoir [30], which is the main source of atmospheric deposition, especially for Hg and other heavy metals associated with coal combustion. The catchment area of the Baihua Reservoir is 1895 km<sup>2</sup>, but pollutants are first transported into the Hongfeng Reservoir, which may serve as a buffer for the Baihua Reservoir. The Baihua Reservoir receives direct inputs from an area of only 299 km<sup>2</sup>. Even so, there are many intense point sources in this small area, including various heavy and light industries (Fig. 2), which have resulted in serious heavy metal pollution in the Baihua Reservoir. In particular, the Baihua Reservoir is noted for its Hg contamination from the Guizhou Organic Chemical Plant (GOCP) [31], which is located in the upper reaches of the Baihua Reservoir and downstream of the Hongfeng Reservoir. The GOCP used Hg-based technology to produce acetaldehyde and discharged Hg-laden wastewater to the Baihua Reservoir via the Dongmenqiao River until 1997. The pollution caused by the GOCP persists to the present day.

### Sampling and Analysis

Two field surveys were conducted in December 2010 and April 2012. Water and sediment samples were collected from 26 sites in the Hongfeng and Baihua Reservoirs (Fig. 1 and Table 1). The field studies were permitted by the Administration of Hongfeng, Baihua and Aha Reservoirs, and did not involve endangered or protected species. There were 13 sites in each reservoir, comprising inlets of main tributaries (sites 1–5 in the Hongfeng Reservoir and sites 14–22 in the Baihua Reservoir) and representative sites within both reservoirs (sites 6–13 in the Hongfeng Reservoir and sites 23–26 in the Baihua Reservoir). Surface water samples were collected in acid-washed polyethylene sample bottles and were acidified with 1:1 nitric acid: deionized water. Water samples were stored at 4°C immediately upon returning from the field. The upper 0–10 cm of sediment was collected, placed into pre-cleaned polyethylene bags, and taken to the laboratory. All sediment samples were freeze-dried and passed through a 2 mm nylon sieve to discard the coarse debris. A pestle and mortar was then used to grind the sieved sediments until all particles were fine enough to pass through a 0.147 mm nylon sieve. Sediment samples were digested in a microwave digestion system with a  $\text{HNO}_3$ -HF-HClO<sub>4</sub>-HCl acid mixture solution before analysis for total heavy metal content. All water samples and the solutions of the digested sediment samples were analyzed by inductively coupled plasma atomic emission spectroscopy for Cr, Cu and Pb. Cd concentrations were determined by graphite

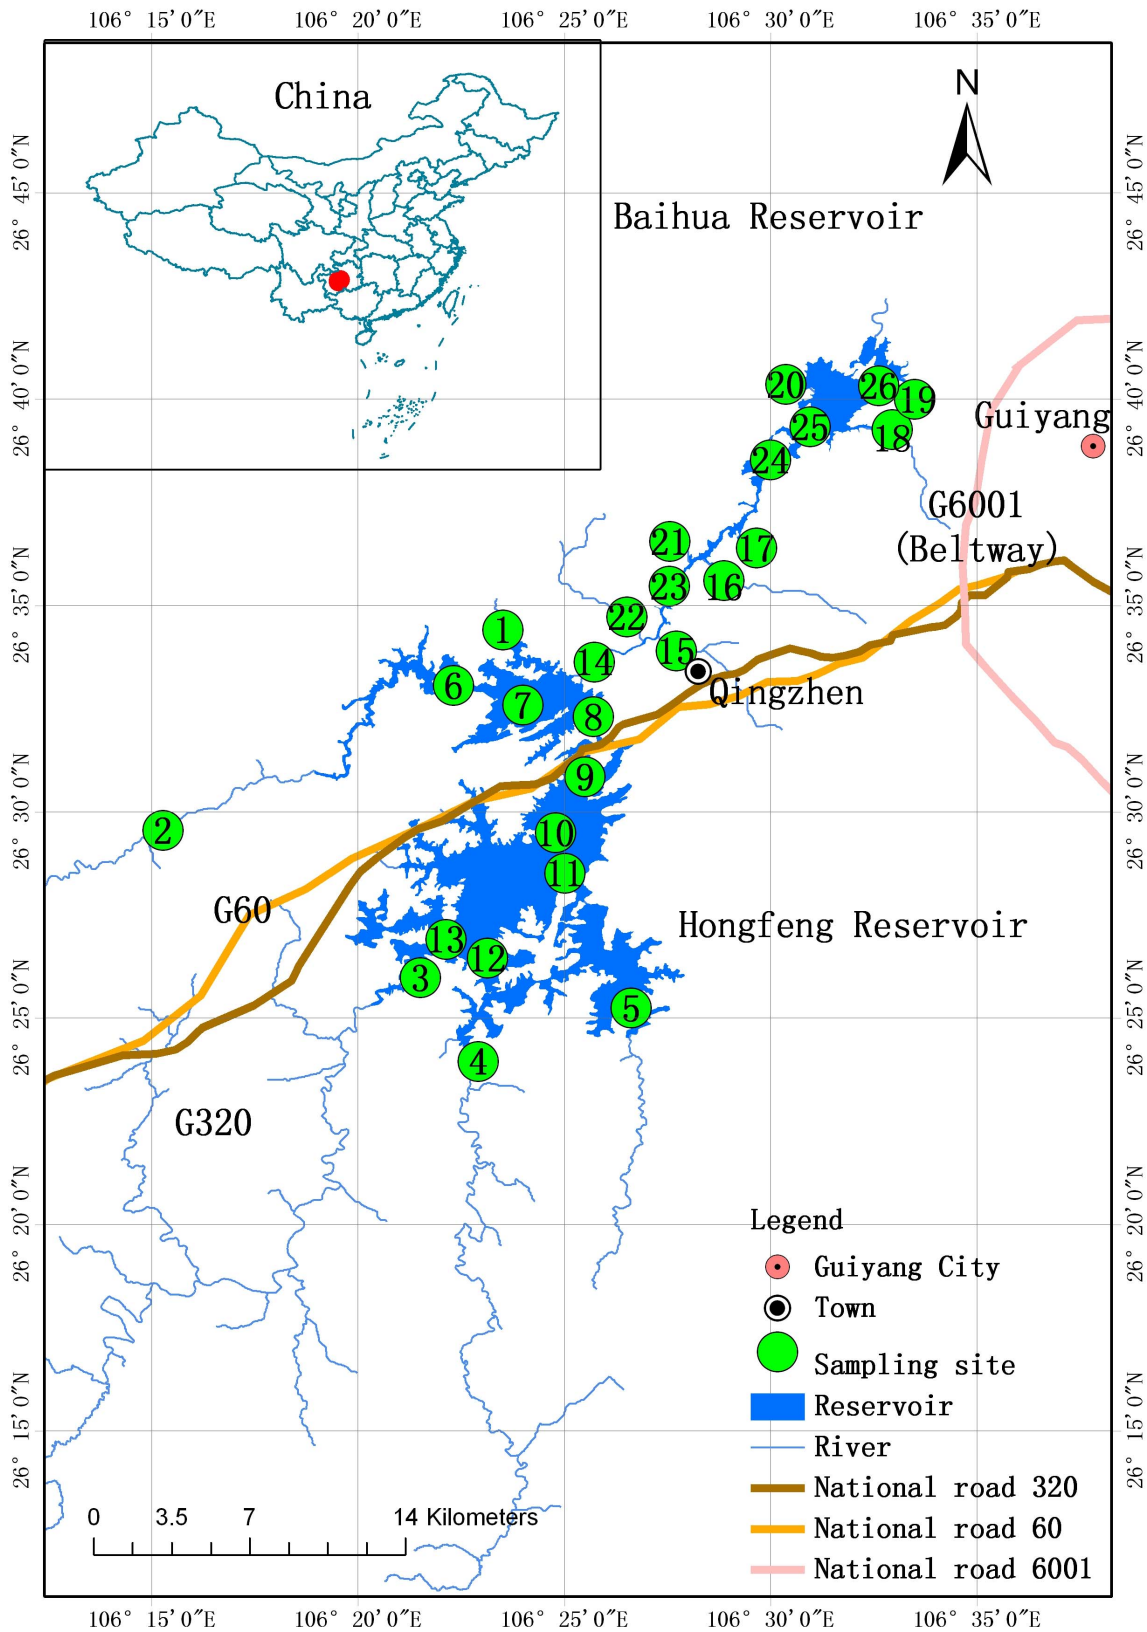

**Figure 1. Map of Hongfeng and Baihua Reservoirs on the Yunnan-Guizhou Plateau, Southwest China.**  
doi:10.1371/journal.pone.0102101.g001

furnace atomic absorption spectrophotometry. As and Hg were measured using atomic fluorescence spectrometry. Quality assur-

ance and quality control of the analyses processes were assessed by duplicates, method blanks and standard reference materials [11].

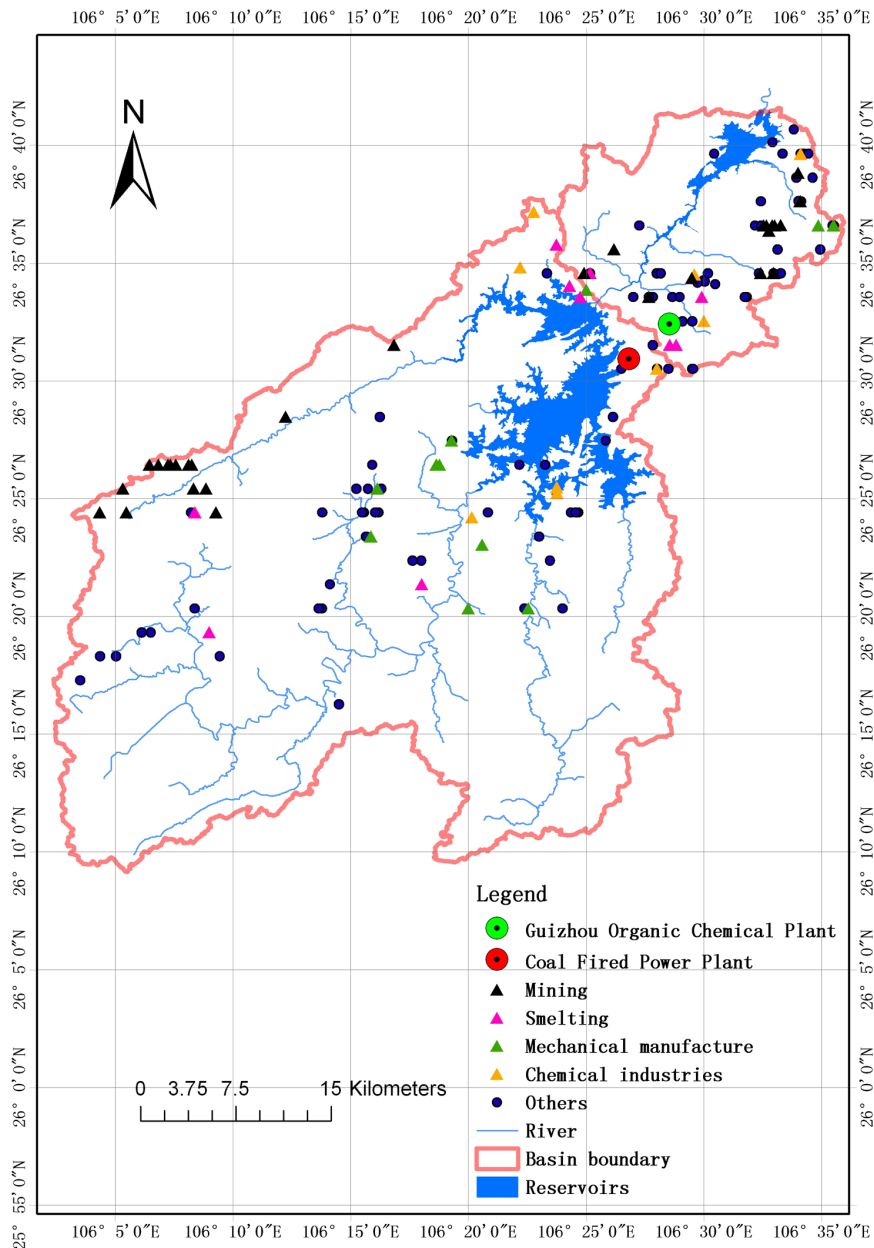

**Figure 2. Distribution of main point sources of pollution in the Hongfeng and Baihua Reservoir basins.**

doi:10.1371/journal.pone.0102101.g002

### Spatial and Statistical Analyses

Spatial and statistical analyses were performed by using Arc GIS 9.3 and SPSS 17.0 for Windows (SPSS Inc., Chicago, IL) to investigate the heavy metal pollution sources separately for the Hongfeng and Baihua Reservoirs. A one-way ANOVA was performed on heavy metal concentrations in sediment to determine whether the differences between the two field surveys were significant. Pearson correlation analysis was used to determine the relationships between the heavy metals in sediment. To obtain more reliable information about the relationships between the heavy metals, a PCA with Varimax normalized rotation was performed separately for the Hongfeng and Baihua Reservoirs. The PCA calculated eigenvectors to determine the common pollution sources, and components with eigenvalues greater than 1 were considered to be relevant [32]. Components

with factor loadings above 0.75, between 0.5 and 0.75, and between 0.3 and 0.5 were considered to be strong, moderate and weak, respectively [33]. Boxplot is a convenient way to depict the full range of data and compare the distributions among different datasets. In this study, the boxplot was used to compare the heavy metal concentrations at site 14, the outlet of the Hongfeng Reservoir and inlet of the Baihua Reservoir, with concentrations at other sites in the tributaries and at sites within the reservoirs, in order to discuss the influence of the upstream Hongfeng Reservoir on the downstream Baihua Reservoir.

### Ecological Risk Assessment

We used two methods to assess the ecological risk of the heavy metals in surface sediments to benthic organisms and humans. First, we used the consensus-based SQGs for freshwater ecosys-

**Table 1.** Locations of sampling sites in the Hongfeng and Baihua Reservoirs on the Yunnan-Guizhou Plateau, Southwest China.

| Reservoir          | Site | Longitude     | Latitude     | Description         |                                       |
|--------------------|------|---------------|--------------|---------------------|---------------------------------------|
| Hongfeng Reservoir | 1    | 106°23'30.64" | 26°34'24.52" | At main tributaries | Maibao River                          |
|                    | 2    | 106°15'3.58"  | 26°29'22.80" |                     | Maiweng River                         |
|                    | 3    | 106°21'30.89" | 26°25'58.34" |                     | Yangchang River                       |
|                    | 4    | 106°22'54.88" | 26°23'56.79" |                     | Maxian River                          |
|                    | 5    | 106°26'42.01" | 26°25'4.80"  |                     | Houliu River                          |
|                    | 6    | 106°22'11.10" | 26°33'44.07" | Within reservoir    | Taipingdi                             |
|                    | 7    | 106°24'2.05"  | 26°32'34.80" |                     | Center of the North Lake              |
|                    | 8    | 106°23'17.43" | 26°32'27.13" |                     | Junction of the North and South Lakes |
|                    | 9    | 106°26'07.06" | 26°30'58.03" |                     | Houwu                                 |
|                    | 10   | 106°24'39.31" | 26°29'19.07" |                     | Center of the South Lake              |
|                    | 11   | 106°25'04.17" | 26°28'33.89" |                     | Jiangjungong                          |
|                    | 12   | 106°23'01.81" | 26°26'26.73" |                     | Yangjiajun                            |
|                    | 13   | 106°22'01.22" | 26°26'37.57" |                     | Sanjiazhai                            |
| Baihua Reservoir   | 14   | 106°25'43.88" | 26°33'37.65" | At main tributaries | Outlet of Hongfeng Reservoir          |
|                    | 15   | 106°27'19.60" | 26°34'7.06"  |                     | Dongmenqiao River                     |
|                    | 16   | 106°28'51.88" | 26°35'36.16" |                     | Maicheng River                        |
|                    | 17   | 106°29'39.21" | 26°36'23.43" |                     | Dianzishanggou River                  |
|                    | 18   | 106°32'56.81" | 26°39'15.61" |                     | Maixi River                           |
|                    | 19   | 106°33'16.38" | 26°40'6.00"  |                     | Banpochanggou River                   |
|                    | 20   | 106°30'22.33" | 26°40'21.27" |                     | Maolizhaigou River                    |
|                    | 21   | 106°27'33.58" | 26°36'32.72" |                     | Xiaohokou River                       |
|                    | 22   | 106°26'47.46" | 26°34'17.11" |                     | Changchong River                      |
|                    | 23   | 106°27'25.20" | 26°35'27.60" | Within reservoir    | Huaqiao                               |
|                    | 24   | 106°30'4.42"  | 26°38'31.42" |                     | Xuantiangong                          |
|                    | 25   | 106°30'50.23" | 26°39'1.37"  |                     | Tangerpo                              |
|                    | 26   | 106°32'48.39" | 26°40'18.16" |                     | Chafan                                |

doi:10.1371/journal.pone.0102101.t001

tems that were proposed by MacDonald et al. [15], which included a threshold effect concentration (TEC) and a probable effect concentration (PEC). TECs are the concentrations below

which adverse effects are not expected on sediment-dwelling organisms, while PECs are concentrations above which adverse effects are expected to occur frequently [34,35]. The mean PEC

**Table 2.** Ecological risk assessment criteria for the sediment quality guidelines (SQGs) and Hakanson index.

| Method         | $C$ or $E_r^i$      | Potential ecological risk for single heavy metal | m-PEC-Q or $RI$              | Ecological risk for all Heavy metals |
|----------------|---------------------|--------------------------------------------------|------------------------------|--------------------------------------|
| SQGs           | $C < TEC$           | Low                                              | m-PEC-Q < 0.1                | Low (<14%) <sup>a</sup>              |
|                | $TEC < C < PEC$     | Moderate                                         | $0.1 < m\text{-PEC-Q} < 1.0$ | Moderate (15–29%) <sup>a</sup>       |
|                | $C > PEC$           | High                                             | $1.0 < m\text{-PEC-Q} < 5.0$ | Considerable (33–58%) <sup>a</sup>   |
|                |                     |                                                  | $m\text{-PEC-Q} > 5.0$       | Very high (75–81%) <sup>a</sup>      |
| Hakanson index | $E_r^i < 40$        | Low                                              | $RI < 95$                    | Low                                  |
|                | $40 < E_r^i < 80$   | Moderate                                         | $95 < RI < 190$              | Moderate                             |
|                | $80 < E_r^i < 160$  | Considerable                                     | $190 < RI < 380$             | Considerable                         |
|                | $160 < E_r^i < 320$ | High                                             | $RI > 380$                   | Very high                            |
|                | $E_r^i > 320$       | Very high                                        |                              |                                      |

$C$ : concentration of heavy metal in surface sediment.  
 TEC: threshold effect level; PEC: probable effect level [15].  
 m-PEC-Q: mean PEC quotient; <sup>a</sup>incidence of toxicity [36].  
 doi:10.1371/journal.pone.0102101.t002

**Table 3.** Summary statistics for heavy metal concentrations in surface sediments from the Hongfeng and Baihua Reservoirs.

|                          | Hg              | Cd                          | Pb               | Cr                 | Cu                   | As                  |                     |
|--------------------------|-----------------|-----------------------------|------------------|--------------------|----------------------|---------------------|---------------------|
| Hongfeng Reservoir       | Mean (Min, Max) | 0.32(0.08, 1.03)            | 0.28(0.01, 0.85) | 28.41(0.10, 89.20) | 86.91(34.10, 141.00) | 43.50(15.70, 93.60) | 15.33(0.12, 45.54)  |
|                          | S.D.            | 0.26                        | 0.36             | 27.55              | 29.65                | 25.09               | 14.92               |
|                          | CV(%)           | 82.86                       | 130.78           | 96.97              | 34.12                | 57.67               | 97.31               |
|                          | Mean (Min, Max) | 0.27(0.04, 0.56)            | 0.53(0.31, 1.37) | 30.22(1.21, 89.20) | 82.78(41.00, 141.00) | 45.46(23.20, 73.80) | 23.31(17.31, 29.61) |
| Baihua Reservoir         | S.D.            | 0.17                        | 0.27             | 25.63              | 23.45                | 17.72               | 3.98                |
|                          | CV(%)           | 62.33                       | 51.27            | 84.78              | 28.32                | 38.99               | 17.07               |
|                          | 2007.3          | 0.99                        | 34.31            | 58.39              | 120.16               | 69.84               | 49.90               |
|                          | 2008.8          | 0.66                        | 0.77             | 35.91              | 87.98                | 91.85               | 29.74               |
| Baihua Reservoir         | 2009.5          | 0.46                        | 0.65             | 118.00             | 118.00               | 88.00               | 40.80               |
|                          | Mean (Min, Max) | 0.68(- <sup>a</sup> , 2.20) | 0.58(0.01, 1.00) | 27.28(0.10, 51.90) | 76.24(30.80, 143.00) | 36.71(0.36, 65.90)  | 29.95(7.95, 48.19)  |
|                          | S.D.            | 0.73                        | 0.37             | 16.89              | 31.50                | 19.77               | 14.80               |
|                          | CV(%)           | 108.24                      | 64.15            | 61.90              | 41.31                | 53.86               | 49.42               |
| Natural Background Value | Mean (Min, Max) | 0.45(0.01, 1.25)            | 0.61(0.23, 1.00) | 27.84(0.10, 51.90) | 76.38(30.12, 143.10) | 43.16(9.38, 73.55)  | 26.23(7.95, 34.75)  |
|                          | S.D.            | 0.48                        | 0.28             | 18.15              | 31.45                | 21.49               | 7.30                |
|                          | CV(%)           | 107.21                      | 46.13            | 65.19              | 41.17                | 49.79               | 27.82               |
|                          | 2007            | 18.90                       | 0.88             | 16.05              | 59.75                | 74.97               | 53.34               |
| 2010.5                   | 0.08–0.15       | 0.08–0.12                   | 18.50–23.90      | 73.90–94.60        | 27.30–36.70          | 27.00–50.00         |                     |

All concentrations are in mg/kg dry weight. <sup>a</sup>: not detected. S.D.: standard deviation; CV: coefficients of variation.  
doi:10.1371/journal.pone.0102101.t003

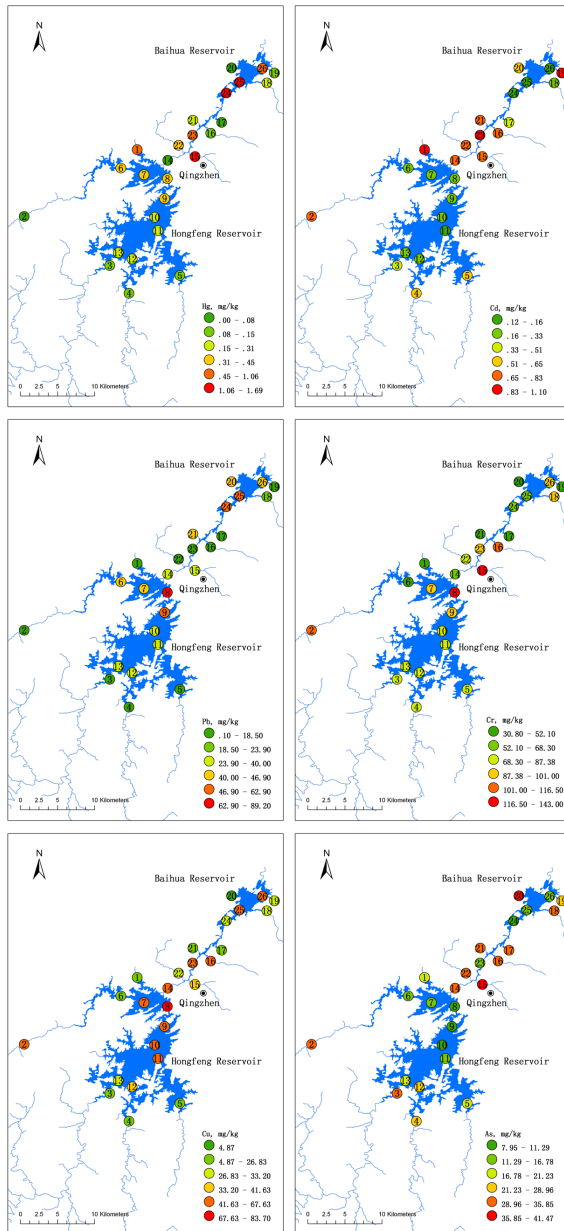

**Figure 3. Heavy metal concentrations in surface sediments from Hongfeng and Baihua Reservoirs.**

doi:10.1371/journal.pone.0102101.g003

quotient ( $m-PEC-Q$ ) [36] was also calculated for each sediment sample to assess the biological significance of the contaminant mixtures as follows:

$$m-PEC-Q = \frac{\sum_{i=1}^n (C_i/PEC_i)}{n} \quad (1)$$

where  $C_i$  is the sediment concentration of compound  $i$ ,  $PEC_i$  is the PEC for compound  $i$  and  $n$  is the number of compounds  $i$ . Four ranges of the mean PEC quotient were developed by Long et al. [36] for ranking samples in terms of toxicity incidence (Table 2).

We also used the Hakanson index, which reflects the risk to human health from fish consumption. This index is based on the assumption that the sensitivity of the aquatic system depends on its productivity [3,18]. The potential ecological risk index ( $RI$ ) was introduced to evaluate heavy metal pollution in sediments by considering the toxicity of heavy metals and the environmental response. The  $RI$  is calculated as follows:

$$RI = \sum E_r^i \quad (2)$$

$$E_r^i = T_r^i C_f^i \quad (3)$$

$$C_f^i = C_0^i / C_n^i \quad (4)$$

where  $RI$  is the total potential ecological risk index for multiple metals,  $E_r^i$  is the potential ecological risk index for a single metal, and  $T_r^i$  is the toxic-response factor for a given metal, considering both toxicity and the sensitivity.  $C_f^i$  is the contamination factor,  $C_0^i$  is the metal concentration in the sediment and  $C_n^i$  is a reference value for metals. In this study, because both reservoirs are moderately eutrophic [37],  $T_r^i$  was described as  $Hg (40) > Cd (30) > As (10) > Cu = Pb (5) > Cr (2)$ , based on the assumption that the bioproduction index was 5 [18].  $C_n^i$  was defined as the upper limit of the natural background value for a given metal in the study area (Table 3). Four ranges of the risk factor  $RI$  were suggested by Hakanson, based on eight metals (polychlorinated biphenyls (PCBs), Hg, Cd, As, Pb, Cu, Cr, and zinc (Zn)). PCBs and Zn were not considered in this study. Based on the different contributions of these elements to the ecological risk index  $RI$ , the adjusted evaluation criteria for  $RI$  based on the six metals in this study are listed in Table 2.

**Table 4. Correlations between heavy metals in surface sediments from the Hongfeng and Baihua Reservoirs.**

|    | Hg      | Cd       | Pb       | Cr      | Cu      | As       |
|----|---------|----------|----------|---------|---------|----------|
| Hg | 1.000   | 0.090    | 0.321    | -0.234  | -0.038  | -0.343   |
| Cd | -0.422* | 1.000    | -0.540** | -0.168  | -0.237  | 0.625**  |
| Pb | 0.511** | -0.506** | 1.000    | 0.438*  | 0.595** | -0.524** |
| Cr | 0.495*  | 0.013    | -0.086   | 1.000   | 0.785** | 0.046    |
| Cu | 0.241   | -0.013   | 0.006    | 0.509** | 1.000   | -0.183   |
| As | -0.414* | 0.476*   | -0.314   | 0.067   | -0.333  | 1.000    |

Hongfeng Reservoir in the upper right corner (blod); Baihua Reservoir in the lower left corner.

Levels of significance: \* $p < 0.05$ ; \*\* $p < 0.01$ .

doi:10.1371/journal.pone.0102101.t004

**Table 5.** Principal Component Analysis (PCA) for heavy metals in surface sediments from the Hongfeng and Baihua Reservoirs.

| Heavy metal    | Hongfeng Reservoir |        |        | Baihua Reservoir |       |
|----------------|--------------------|--------|--------|------------------|-------|
|                | F1                 | F2     | F3     | F1               | F2    |
| Hg             |                    |        | 0.973  | -0.669           | 0.523 |
| Cd             |                    | 0.924  |        | 0.821            |       |
| Pb             | 0.605              | -0.575 | 0.378  | -0.800           |       |
| Cr             | 0.929              |        |        |                  | 0.902 |
| Cu             | 0.930              |        |        |                  | 0.799 |
| As             |                    | 0.851  | -0.334 | 0.705            |       |
| Variance (%)   | 35.29              | 32.24  | 21.35  | 37.84            | 29.32 |
| Cumulative (%) | 35.29              | 67.53  | 88.88  | 37.84            | 67.16 |

Factor loadings smaller than 0.3 have been removed.

Extraction method: PCA, Rotation method: Varimax with Kaiser normalization.

doi:10.1371/journal.pone.0102101.t005

## Results and Discussion

### Heavy Metal Concentrations in Water Samples and Surface Sediments

Of the 6 heavy metals, only Hg and As were detected in the water samples in December 2010, while Hg, Cd, Cr (VI) and As were detected in April 2012. Their concentrations were similar in the Hongfeng and Baihua Reservoirs, with Cd, Cr (VI), and As concentrations lower than Class I as defined in the Chinese Environmental Quality Standards for Surface Water (GB3838-2002, <0.001 mg/L for Cd, <0.01 mg/L for Cr (VI), and <0.05 mg/L for As) and Hg concentrations ranging from Class I (GB3838-2002, <0.00005 mg/L) to Class IV (GB3838-2002, 0.0001–0.001 mg/L) among different sites. The low heavy metal concentrations in water were primarily due to the accumulation in sediments because the alkaline environment in both reservoirs provides ideal conditions for adsorption and precipitation [27]. Moreover, the sediment accumulation rate in both reservoirs was quite high [38], contributing to the removal of heavy metals from the water column. A prior one-way ANOVA analysis was conducted to examine the variation in heavy metal concentrations in sediment between the two field surveys. None of the heavy metals in Hongfeng and Baihua Reservoirs displayed significant variation in means ( $p>0.05$ ), although Cd in Hongfeng Reservoir and As in both reservoirs showed significant changes in their variances ( $p<0.05$ ). The significant differences in variance for Cd and As are mainly because of their higher concentrations in the sites within the reservoirs and the reduced spatial heterogeneity in the second field sampling comparing to the first one. However, the general spatial patterns for Cd and As (with higher concentrations at sites in the tributaries than at sites within the reservoirs) were still similar between the two field surveys. Those results indicate that the pollution sources for the metals were relatively stable between the two surveys. The concentrations of heavy metals in surface sediments of both reservoirs from the two field surveys are summarized in Table 3. Heavy metal concentrations in sediment were much higher than those in water. In general, the mean Hg, Cd and As sediment concentrations in the Baihua Reservoir were higher than those in the Hongfeng Reservoir, while Pb, Cr and Cu were higher in the Hongfeng Reservoir. Comparison with the results of previous studies [27,39,40,41,42,43] shows that most of the heavy metal concentrations in both reservoirs have decreased, though by differing amounts (Table 3). In particular, the Hg concentrations in the Baihua Reservoir have decreased signifi-

cantly, indicating that measures taken in recent years have been effective and resulted in improvements. During the two field surveys, the mean concentrations of Hg, Cd, Pb and Cu, and the maximum concentrations of Cr in both reservoirs exceeded the upper limit of the natural background values for the study area [44], indicating anthropogenic sources. However, the concentrations of As (including the minimum and maximum values) in both reservoirs were well within the range of the natural background values [44], implying no significant anthropogenic impact and primarily lithogenic sources.

### Heavy Metal Pollution Sources

To develop control strategies for environmental pollution, it is very important to identify its source. Spatial and statistical analyses were performed to identify the possible pollution sources for heavy metals in the Hongfeng and Baihua Reservoirs. The average concentrations of heavy metals in the sediments from the two field surveys were used to study the spatial distributions, while all data in the sediments from the two field surveys were used in a Pearson correlation analysis and PCA. The spatial distribution patterns of Hg, Cd, Pb, Cr, Cu and As in surface sediments of both reservoirs are shown in Figure 3. The Pearson correlation coefficients and the results of the PCA for the investigated metals are shown in Table 4 and Table 5, respectively. All of the results were generally consistent with each other.

Specifically, the PCA yielded three significant components for Hongfeng Reservoir and two significant components for Baihua Reservoir, accounting for 88.88% and 67.16% of the cumulative variance, respectively (Table 5). For the Hongfeng Reservoir, the first component (F1), explaining 35.29% of the total variance, had strong positive loadings of Cr and Cu, and moderate positive loading of Pb. Those three heavy metals exhibited similar spatial distributions in the Hongfeng Reservoir, with unexpectedly higher concentrations at reservoir sites than at tributary sites. In particular, site 8 (at the junction of the North and South Lakes) showed the highest concentrations for all of the three heavy metals, and site 9 (near Houwu) also showed relatively high concentrations (Fig. 3). In addition, those three heavy metals were highly correlated (Table 4,  $p<0.01$  for Cr-Cu and Cu-Pb,  $p<0.05$  for Cr-Pb), indicating their similar origins or comparable chemical properties [45]. This phenomenon might be caused by two possible reasons. Firstly, Bai et al. [46] found that traffic pollution was responsible for the high heavy metal concentrations (including comparable Cr, Cu and Pb concentrations with our study) along



**Table 6.** Results of ecological risk assessments for single heavy metal from two methods for the Hongfeng and Baihua Reservoirs.

|                                  | Hg    | Cd    | Pb     | Cr     | Cu     | As     |
|----------------------------------|-------|-------|--------|--------|--------|--------|
| TEC                              | 0.18  | 0.99  | 35.8   | 43.4   | 31.6   | 9.79   |
| PEC                              | 1.06  | 4.98  | 128    | 111    | 149    | 33     |
| Hongfeng Reservoir               | 69.23 | 7.69  | 38.46  | 92.31  | 61.54  | 84.62  |
| % samples which exceeded TEC     | 0.00  | 0.00  | 0.00   | 15.38  | 0.00   | 15.38  |
| % samples which exceeded PEC     | 30.77 | 7.69  | 100.00 | 100.00 | 100.00 | 100.00 |
| % samples with $E_i < 40$        | 23.08 | 53.85 | 0.00   | 0.00   | 0.00   | 0.00   |
| % samples with $40 < E_i < 80$   | 38.46 | 23.08 | 0.00   | 0.00   | 0.00   | 0.00   |
| % samples with $80 < E_i < 160$  | 7.69  | 15.38 | 0.00   | 0.00   | 0.00   | 0.00   |
| % samples with $160 < E_i < 320$ | 0.00  | 0.00  | 0.00   | 0.00   | 0.00   | 0.00   |
| % samples with $E_i > 320$       | 53.85 | 7.69  | 38.46  | 84.62  | 46.15  | 92.31  |
| Baihua Reservoir                 | 30.77 | 0.00  | 0.00   | 7.69   | 0.00   | 38.46  |
| % samples which exceeded TEC     | 38.46 | 23.08 | 100.00 | 100.00 | 100.00 | 100.00 |
| % samples which exceeded PEC     | 15.38 | 0.00  | 0.00   | 0.00   | 0.00   | 0.00   |
| % samples with $E_i < 40$        | 7.69  | 15.38 | 0.00   | 0.00   | 0.00   | 0.00   |
| % samples with $40 < E_i < 80$   | 15.38 | 61.54 | 0.00   | 0.00   | 0.00   | 0.00   |
| % samples with $80 < E_i < 160$  | 23.08 | 0.00  | 0.00   | 0.00   | 0.00   | 0.00   |
| % samples with $160 < E_i < 320$ | 0.00  | 0.00  | 0.00   | 0.00   | 0.00   | 0.00   |
| % samples with $E_i > 320$       | 0.00  | 0.00  | 0.00   | 0.00   | 0.00   | 0.00   |

All concentrations are in mg/kg dry weight.  
doi:10.1371/journal.pone.0102101.t006

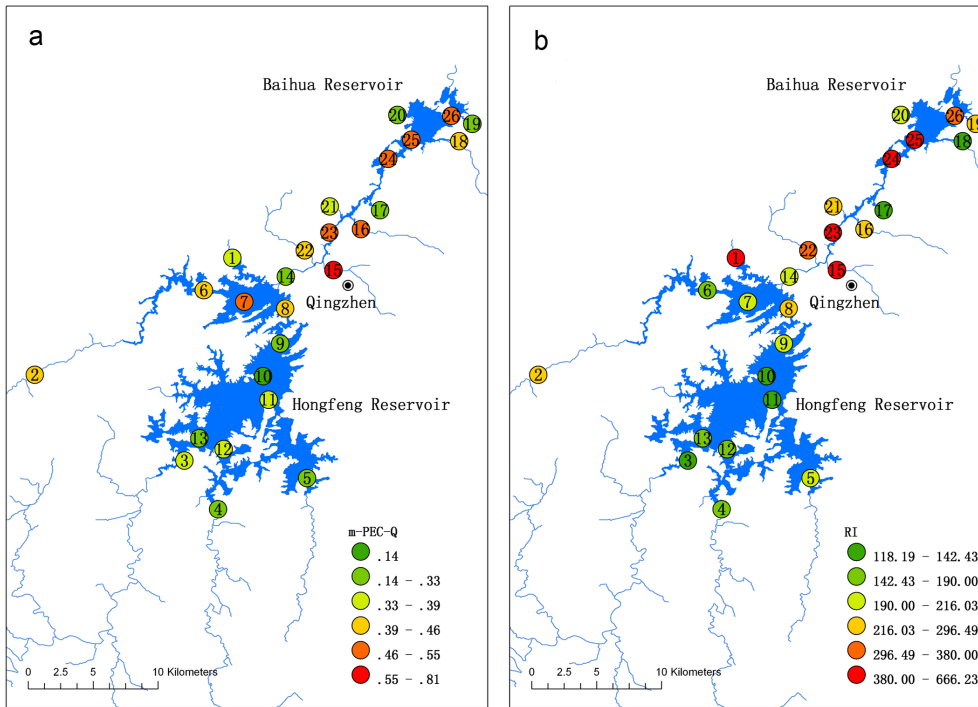

**Figure 4. Mean PEC quotient (a) and potential ecological risk indexes (b) of heavy metals in sediments.**  
doi:10.1371/journal.pone.0102101.g004

the roadside of National Road 320 in the Yunnan province (adjacent to Guizhou Province), and Zhu et al. [47] also found that road dust samples were severely polluted by Cr, Cu and Pb in another metal smelting/processing industrial city in Guizhou Province. In this study, the National Road 60 and the National Road 320 pass close to the junction of the South and North Lakes of the Hongfeng Reservoir (Fig. 1), which suggests that the traffic emissions, through atmospheric deposition and road runoff, could result in heavier pollution in sites near the roadway (site 8 and 9). Secondly, the high concentrations of Cr, Cu and Pb at reservoir sites are likely to be related to the residual effect from former industrial activities (e.g., mining, smelting, mechanical manufacture and chemical industry). The metals are more likely retained in the sediment of sites within the reservoirs rather than sites in the tributaries because heavy metal accumulation in lake sediments is generally higher than that in rivers [3]. Additionally, the complex hydrodynamic conditions at the junction of the South and North Lakes may affect the heavy metal distributions in sediment, which requires further research. Therefore, the first component (F1) might reflect mixed sources from traffic pollution and the residual effect of former industrial influence. The second component (F2), explaining 32.24% of the total variance, was dominated by Cd and As. Similar spatial patterns were observed for Cd and As, with higher concentrations at tributary sites than at sites within the reservoirs, indicating that they mainly come from the inflows (Fig. 3). As expected, significantly positive correlations were found between Cd and As (Table 4,  $p < 0.01$ ). However, Cd showed apparent anthropogenic origin, with most sites exceeding its natural background values, while As levels suggested natural origins, with all sites well within the natural background values (Table 3). Cd is closely related to industrial activities, such as smelting, electroplating and plastics production in the upstream areas. Hence, F2 may reflect the pollution through inflows from both industrial activities and natural weathering and erosion. The

third component (F3) had strong positive loading on Hg and a weak positive loading on Pb, accounting for 21.35% of the total variance. The highest Hg concentration in Hongfeng Reservoir was found at site 1 in the tributary of Maibao River, which has several smelting and chemical industries in its upstream (Fig. 2). Meanwhile, for both Hg and Pb, the North Lake were more polluted than the South Lake, and three tributaries in the South Lake showed concentrations well within the natural background values. Feng et al. [30] found that runoff due to soil erosion was the main source of Hg in sediment in the South Lake of the Hongfeng Reservoir. Thus, F3 may reflect the pollution from inflows from industrial activities in the North Lake and lithogenic origin in the South Lake. In addition, He [48] found that atmospheric deposition from coal combustion was also an important source of Hg in the Hongfeng Reservoir, which was not clearly distinguished by the PCA.

For Baihua Reservoir, the first component (F1), explaining 37.84% of total variance, showed strong positive loadings on Cd and As. Similar spatial distributions (with higher concentrations at tributary sites than at sites within the reservoirs) (Fig. 3) and positive correlations were also found between Cd and As (Table 4,  $p < 0.05$ ). As discussed above, F1 in Baihua Reservoir might be similar to F2 in Hongfeng Reservoir, including the pollution through inflows from both industrial activities and natural origin. The second component (F2) had a moderate positive loading of Hg and strong positive loadings on Cr and Cu. The highest Hg and Cr concentration in the Baihua Reservoir was found at site 15 in the Dongmengqiao tributary, which received wastewater from the GOCP and many other industries (Fig. 2). The highest Cu concentration in the Baihua Reservoir was at site 16 in the tributary of the Maicheng River, which has several industries (especially mining) in its upstream (Fig. 2). Strong associations were found between Cr and Cu ( $p < 0.01$ ) and between Cr and Hg ( $p < 0.05$ ) (Table 4). F2 obviously represented industrial activity

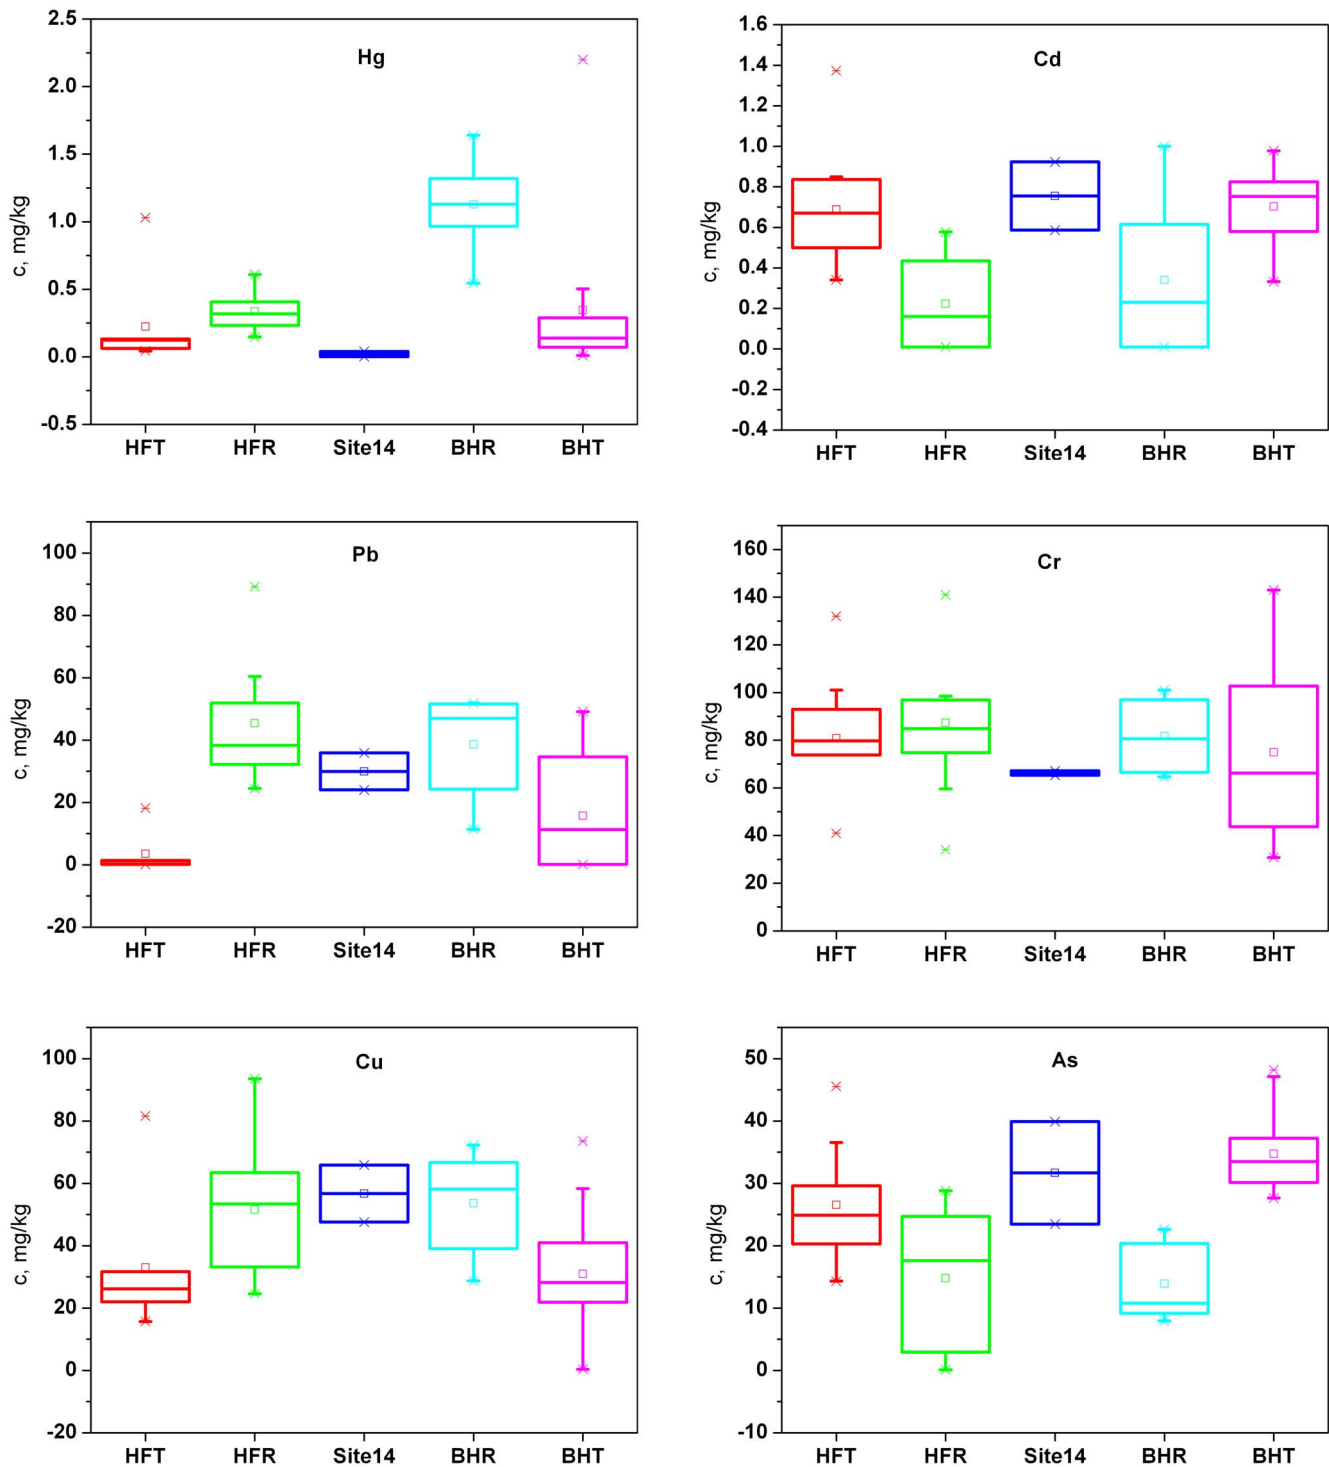

**Figure 5. Comparison of heavy metal concentrations in sediments.** (HFT: sites at inlets of main tributaries in the Hongfeng Reservoir, namely sites 1–5; HFR: representative sites within Hongfeng Reservoir, namely sites 6–13; BHT: sites at inlets of main tributaries in the Baihua Reservoir (except site 14), namely sites 15–22; BHR: representative sites within the Baihua Reservoir, namely sites 23–26). doi:10.1371/journal.pone.0102101.g005

upstream. On the other hand, the PCA failed to identify Pb sources in Baihua Reservoir, but only showed its strong negative associations with F1, indicating that there may be significant sources other than F1 and F2 for Pb. The spatial pattern of Pb in the Baihua Reservoir also showed much higher concentrations at sites within the reservoir than at sites in the tributaries (Fig. 3).

Although no main road crosses Baihua Reservoir directly, it is close to the urban district of Guiyang City, which has several roads and high traffic density (Fig. 1 only shows the main beltway and there are many other crisscrossed roads inside the beltway). In addition, Pb was added to gasoline in China until June 2000 [49]. Hence, Pb may originate from traffic pollutants deposited

atmospherically. Moreover, highly positive correlations were found between Pb and Hg ( $p < 0.01$ ), implying that Hg might also come from atmospheric deposition (coal combustion) in addition to from the factors associated with F2.

### Ecological Risk Assessment of Heavy Metals in Surface Sediments

Because there was no significant change in the mean heavy metal concentrations in sediment between the two field surveys, the average concentrations were used to study the ecological risk of single heavy metals and the combined ecological effects of six heavy metals for the two study reservoirs using both the SQG and Hakanson index methods (Table 6). The SQG method revealed that the metal concentrations were within the TEC and PEC ranges for Hg, Cd, Pb and Cu at 69.23%, 7.69%, 38.46% and 61.54% of the sites in the Hongfeng Reservoir, and for Cd, Pb and Cu at 7.69%, 38.46% and 46.15% of sites in the Baihua Reservoir. The heavy metals at the remaining sites in the corresponding reservoirs fell below the TEC. Cr and As exceeded the PEC at 15.38% of sites in the Hongfeng Reservoir and Hg, Cr and As exceeded the PEC at 30.77%, 7.69% and 38.46%, respectively, of sites in the Baihua Reservoir. Previous studies have shown that ecological risk assessments should consider the regional background values and that exceeding the SQG values does not always lead to adverse ecological effects [50]. Therefore, the As concentrations within background ranges in both reservoirs should be excluded. The Cr in the Hongfeng Reservoir and both Hg and Cr in the Baihua Reservoir may pose significant ecological risks for sediment-dwelling organisms, and they deserve special attention. Heavy metals within the TEC–PEC (viz., Hg in Hongfeng Reservoir and Cd, Pb and Cu in both reservoirs) are also a cause for concern because this uncertain area may be considered to be moderately polluted [10]. The toxicity, derived from mean PEC quotients, that results from the mixture of the six heavy metals at each sampling site in both reservoirs is shown in Figure 4a. Overall, mean PEC quotients for samples in the Baihua Reservoir (range 0.28–0.81) were slightly higher than those in the Hongfeng Reservoir (range 0.14–0.55). However, the mean PEC quotients for all of the samples in both reservoirs were well within the range of 0.1 to 1.0, indicating moderate toxicological risks for sediment-dwelling organisms, with a toxicity incidence of between 15 and 29% in the study areas (Table 2).

The Hakanson method expresses the threat to humans from fish consumption. The results from this index were quite different from those for the SQG method (Table 6). Both Hg and Cd posed high potential ecological risks at 7.69% and 15.38% of sites, considerable risks at 38.46% and 23.08% of sites and moderate risks at 23.08% and 53.85% of sites, respectively, in the Hongfeng Reservoir. The risks were higher in the Baihua Reservoir, in which there was a very high potential ecological risk from Hg at 23.08% of sites, high risks from Hg and Cd at 15.38% and 61.54% of sites, considerable risks from Hg and Cd at 7.69% and 15.38% of sites, and a moderate risk from Hg at 15.38% of sites. However, the other heavy metals (Pb, Cr, Cu and As) posed little potential ecological risks for all sites in both reservoirs, with  $E_r^i$  values lower than 40. The high concentrations and toxic-response factors of Hg and Cd in both reservoirs contribute to their posing higher ecological risks than the other metals we examined.  $RI$  illustrates the potential ecological risk from heavy metal mixtures, and  $RI$  at all sites in both reservoirs were higher than 95 (Fig. 4b). Site 1 showed the highest potential ecological risk ( $RI = 484.25$ ) in the Hongfeng Reservoir, at a level that should cause concern because it poses a very high risk. Sites 2, 5 and 7–9 exhibited considerable ecological risks, while other sites showed moderate ecological risks

in the Hongfeng Reservoir. The combined ecological risk was more severe in the Baihua Reservoir. The  $RI$  at site 15 (Dongmenqiao tributary) and 23–25 (within the reservoir) were much higher than 380, which indicates a very high potential ecological risk. All of the other sites exhibited considerable ecological risks (except for the moderate ecological risks at site 17 and 18). Therefore, there are moderate to very high potential ecological risks from heavy metal mixtures in the sediments of both reservoirs. In addition, the contribution of the monomial potential ecological risk to  $RI$  for the six heavy metals in both reservoirs decreased in the following order:  $Hg \approx Cd > As > Cu > Pb > Cr$ , with the greatest ecological risk from Hg and Cd.

Overall, the ecological risks from either a single heavy metal or from mixed heavy metals were different for the two receptors (viz., sediment-dwelling organisms and human beings through fish consumption) in both prior contaminants and risk level. However, hot spots with higher ecological risks were similar even though two different methods were used, and they were mainly located in the North Lake and the Houwu area of the Hongfeng Reservoir and in the key tributaries and at all of the sites in the Baihua Reservoir. Therefore, the need for industrial wastewater and mining tailings treatment in upstream watersheds of both reservoirs should be highlighted, especially for the tributaries in the North Lake of the Hongfeng Reservoir and in the key tributaries of the Baihua Reservoir. Additionally, given that the lakes are sources for drinking water, continuous monitoring should be increasingly implemented in areas near their inflows. Finally, there is uncertainty in both the SQG and Hakanson index methods because the SQGs were developed in North America and the toxic-response factor in the Hakanson method is not very sophisticated. Therefore, further on-site or laboratory toxicological experiments should be carried out to ascertain the actual adverse effects on sediment-dwelling organisms and different fish species [10,50], as well as to determine the impacts on human health from consuming fish from the study area.

### Influence of the Hongfeng Reservoir on the Baihua Reservoir

Reservoir construction generally leads to an increase in residence time and a decrease in suspended solids and turbidity. For an alkaline reservoir on the Yunnan-Guizhou Plateau such as the Hongfeng Reservoir, heavy metals tend to be adsorbed to suspended solids, and sediments then settle on the lake bed, resulting in fewer heavy metals in water. Hence, in heavily polluted areas, reservoirs may serve as a sink for pollutants and a buffer for downstream receiving areas. In this study, the catchment area upstream of the Hongfeng Reservoir occupies 84% of the Baihua Reservoir catchment area, and the heavy metal concentrations at site 14, the outlet of the Hongfeng Reservoir and inlet of the Baihua Reservoir, reflect the buffering effect of the Hongfeng Reservoir according to our two field surveys. The metals (Hg, Cd, Cr (VI) and As) in the surface water at site 14 had lower concentrations than they did at the inflow tributary sites of the Hongfeng Reservoir (results not shown). The sediment concentration of Hg was much lower at site 14 than at most sites at the tributaries and within the Hongfeng Reservoir (Fig. 5). He [48] also found that the Hongfeng Reservoir functioned as a net sink for Hg and that it intercepted a large amount of Hg before it was conveyed to the Baihua Reservoir. The sediment concentrations of Cd and As were lower at site 14 than the maximum concentration at the tributaries of Hongfeng Reservoir, although they were generally higher there than at sites within Hongfeng Reservoir (Fig. 5). Due to the different pollution sources (some indirect rather than through inflows), higher concentrations of Pb, Cr and Cu

were found at the reservoir sites than at the tributary sites, and the sediment concentrations of Pb, Cr and Cu were generally lower at site 14 than at sites within the Hongfeng Reservoir (Fig. 5). On the other hand, the outflow of the Hongfeng Reservoir has accounted for an average of 70% of the total inflow of the Baihua Reservoir over the last 6 years (2005–2010, provided by the Administration of Hongfeng, Baihua and Aha Reservoirs), implying that the Hongfeng Reservoir may also serve as an important source for total metals in the Baihua Reservoir. For example, the concentrations of the metals (Hg, Cd, Cr (VI) and As) detected in water samples at site 14 fell in the mid-range of the concentrations in the other tributaries of the Baihua Reservoir (results not shown). The concentrations of all of the heavy metals in sediments at site 14 were generally within the concentration ranges of heavy metals in other tributaries of the Baihua Reservoir, with Hg at the low end, Cr in the medium range, and Cd, Pb, Cu and As at the high end (Fig. 5). However, the sediment concentrations of Cd and As at site 14 were generally higher than at sites within the Hongfeng Reservoir. This pattern was not found in the other heavy metals, resulting in uncertainty when considering whether the relatively high concentrations of Cd and As at site 14 came from the Hongfeng Reservoir or not (Fig. 5). Because Cd was mainly from industrial activities and no emission sources exist near site 14 (as determined by the field investigation), the high concentrations at site 14 might result from the pollution of site 1 (Fig. 3) because our sampling sites within the Hongfeng Reservoir did not cover the area near the outlet. In terms of the spatial distribution and the lithogenic source of As, the high concentrations at site 14 might be affected by other factors, such as soil type and land use of the nearby banks. Therefore, for heavy metal concentrations in sediment, the Hongfeng Reservoir might be an important source of Cd, Cu and Pb, and a moderately important source of Cr, but might not be an important source of Hg and As for the Baihua Reservoir. The results also indicate that the Hongfeng Reservoir is not always the most important source for total metals in the Baihua Reservoir, and other tributaries contribute large quantities of pollutants to the Baihua Reservoir, some of which even exceed the levels in the Hongfeng Reservoir. It should also be noted that our field surveys only indirectly reflect the potential long-term impacts from Hongfeng Reservoir on heavy metals in the sediment of the Baihua Reservoir, and continuous monitoring of inflows and outflows of both reservoirs are needed for the specific contribution of the upstream reservoir to the downstream reservoir in future studies.

Other factors contribute to the adverse effects of the Hongfeng Reservoir on the Baihua Reservoir. The Hongfeng Reservoir is a deep reservoir with thermal stratification from May to November [37], and its release water is mainly from the hypolimnion, which has a lower DO concentration, higher CO<sub>2</sub> concentration and lower pH than surface water during those months [21,37]. The water chemistry in the hypolimnion favors the release of heavy metals from the sediments and changes the speciation and toxicity of heavy metals. He et al. [37] found that the low DO and pH in hypolimnion accelerated Hg methylation at Houwu (near site 9) and enhanced the release of methylmercury from sediments at Daba (near the outlet) in the Hongfeng Reservoir in summer. He et al. [37] also concluded that the Hongfeng Reservoir was a net source of methylmercury for the Baihua Reservoir. In addition,

the release of hypolimnetic water has a cooling effect in the summer and a warming effect in winter, which may have a significant influence on the temperature downstream, and thus may indirectly influence the heavy metal distribution. Therefore, the outflow of the Hongfeng Reservoir may pose serious risks to ecosystems in the Baihua Reservoir. Further research is needed to help understand the influence of heavy metals and their chemical forms as they are transported downstream from reservoirs.

## Conclusions

This study of heavy metal (Hg, Cd, Pb, Cr, Cu and As) concentrations in surface water and sediments from two adjacent drinking water reservoirs (the Hongfeng and Baihua Reservoirs) on the Yunnan-Guizhou Plateau, Southwest China, showed that surface water was polluted by Hg, and sediments were polluted by Hg, Cd, Pb, Cr and Cu. In both reservoirs, Cd and As mainly came from industrial activities and lithogenic source through inflows, respectively. The Pb, Cr and Cu in Hongfeng Reservoir may have arisen from a mixture of sources (traffic pollution and residual effect of former industrial influence), and they were present at higher concentrations at the junction of the North and South Lakes. Hg sources in the Hongfeng Reservoir might include the sources that contribute Hg through inflows, which were different for the North (industrial activities) and South Lakes (lithogenic origin), and atmospheric deposition resulting from coal combustion. For the Baihua Reservoir, Hg, Cr and Cu were primarily derived from upstream industrial activities, and the Pb originated from traffic pollution. Additionally, the Hg in Baihua Reservoir might have come from atmospheric deposition (coal combustion). Ecological risk was assessed using the SQGs and the Hakanson potential ecological risk index. There were moderate toxicological risks for sediment-dwelling organisms (with the main risks from Hg and Cr) and moderate to very high potential ecological risks for humans from fish consumption (with the main risk coming from Hg and Cd) in both reservoirs. Overall, the risks were higher in the Baihua Reservoir. Improved treatment of industrial wastewater and mining tailings in upstream watersheds would alleviate the pollution and ecological risk in both reservoirs, especially for tributaries of the North Lake of the Hongfeng Reservoir and the key tributaries of the Baihua Reservoir. Ecological restoration could be considered to counteract the residual effects from previous pollution; however, more research is needed in this area. In terms of heavy metal concentrations, the Hongfeng Reservoir acts as a buffer, but it is still an important source of Cd, Cu and Pb and a moderately important source of Cr for the Baihua Reservoir. The Hongfeng Reservoir also had adverse effects on the Baihua Reservoir and merits further research. These findings provide useful information about sediment quality in adjacent reservoirs on the Yunnan-Guizhou Plateau.

## Author Contributions

Conceived and designed the experiments: GQW CML. Performed the experiments: BBW GQW JW QF. Analyzed the data: BBW JW. Contributed reagents/materials/analysis tools: BBW JW QF. Wrote the paper: BBW GQW.

## References

1. Liu WX, Li XD, Shen ZG, Wang DC, Wai OWH, et al. (2003) Multivariate statistical study of heavy metal enrichment in sediments of the Pearl River Estuary. *Environ Pollut* 121: 377–388.
2. Chabukdhara M, Nema AK (2012) Assessment of heavy metal contamination in Hindon River sediments: A chemometric and geochemical approach. *Chemosphere* 87: 945–953.

3. Yi YJ, Yang ZF, Zhang SH (2011) Ecological risk assessment of heavy metals in sediment and human health risk assessment of heavy metals in fishes in the middle and lower reaches of the Yangtze River Basin. *Environ Pollut* 159: 2575–2585.
4. Uluturhan E, Kucuksezgin F (2007) Heavy metal contaminants in Red Pandora (*Pagellus erythrinus*) tissues from the Eastern Aegean Sea, Turkey. *Water Res* 41: 1185–1192.
5. Singh KP, Mohan D, Singh VK, Malik A (2005) Studies on distribution and fractionation of heavy metals in Gomti river sediments—a tributary of the Ganges. *J Hydrol* 312: 14–27.
6. Larsen B, Jensen A (1989) Evaluation of the sensitivity of sediment monitoring stationary in pollution monitoring. *Mar Pollut Bull* 20: 556–560.
7. Li XD, Wai OWH, Li YS, Coles BJ, Ramsey MH, et al. (2000) Heavy metal distribution in sediment profiles of the Pearl River estuary, South China. *Appl Geochem* 15: 567–581.
8. Agarwal A, Singh RD, Mishra SK, Bhunya PK (2005) ANN-based sediment yield river basin models for Vamsadhara (India). *Water SA* 31: 95–100.
9. Loska R, Wiechula D (2003) Application of principal component analysis for the estimation of source of heavy metal contamination in surface sediments from the Rybnik Reservoir. *Chemosphere* 51: 723–733.
10. Larrose A, Coynel A, Schafer J, Blanc G, Masse L, et al. (2010) Assessing the current state of the Gironde Estuary by mapping priority contaminant distribution and risk potential in surface sediment. *Appl Geochem* 25: 1912–1923.
11. Bai JH, Cui BS, Chen B, Zhang KJ, Deng W, et al. (2011) Spatial distribution and ecological risk assessment of heavy metals in surface sediments from a typical plateau lake wetland, China. *Ecol Model* 222: 301–306.
12. Persaud D, Jaagumagi R, Hayton A (1993) Guidelines for the protection and management of aquatic sediment quality in Ontario. Water Resources Branch. Ontario Ministry of the Environment, Toronto, 27.
13. Smith SL, MacDonald DD, Keenleyside KA, Ingersoll CG, Field J (1996) A preliminary evaluation of sediment quality assessment values for freshwater ecosystems. *J Great Lakes Res* 22: 624–638.
14. Ingersoll CG, Haverland PS, Brunson EL, Canfield TJ, Dwyer FJ, et al. (1996) Calculation and evaluation of sediment effect concentrations for the amphipod *Hyalella azteca* and the midge *Chironomus riparius*. *J Great Lakes Res* 22: 602–623.
15. Macdonald DD, Ingersoll CG, Berger TA (2000). Development and evaluation of consensus-based sediment quality guidelines for freshwater ecosystems. *Arch Environ Contam Toxicol* 39: 20–31.
16. Word JQ, Albrecht BB, Anghera ML, Baudo R, Bay MS, et al. (2002). Predictive ability of sediment quality guidelines. In: Wenning RJ, Batley GE, Ingersoll CG, Moore DW, editors. Use of sediment quality guidelines and related tools for the assessment of contaminated sediments. Pensacola (FL): SETAC. p 121–162.
17. Bhavsar SP, Gewurtz SB, Helm PA, Labencki TL, Marvin CH, et al. (2010) Estimating sediment quality thresholds to prevent restrictions on fish consumption: Application to polychlorinated biphenyls and dioxins–furans in the Canadian Great Lakes. *Integr Environ Assess Manag* 6: 641–652.
18. Hakanson L (1980) An ecological risk index for aquatic pollution control: A sedimentological approach. *Water Res* 14: 975–1001.
19. Liu Y, Guo HC, Yu YJ, Huang K, Wang Z (2007) Sediment chemistry and the variation of three altiplano lakes to recent anthropogenic impacts in southwestern China. *Water SA* 33: 305–310.
20. Feng XB, Jiang HM, Qiu GL, Yan HY, Li GH, et al. (2009a) Mercury mass balance study in Wujiangdu and Dongfeng Reservoirs, Guizhou, China. *Environ Pollut* 157: 2594–2603.
21. Wang FS, Wang BL, Liu CQ, Wang YC, Guan J, et al. (2011a) Carbon dioxide emission from surface water in cascade reservoirs–river system on the Maotiao River, southwest of China. *Atmos Environ* 45: 3827–3834.
22. Wang FS, Liu CQ, Wang BL, Liu XL, Li GR, et al. (2011b) Disrupting the riverine DIC cycling by series hydropower exploitation in Karstic area. *Appl Geochem* 26: S375–S378.
23. Feng XB, Jiang HM, Qiu GL, Yan HY, Li GH, et al. (2009b) Geochemical processes of mercury in Wujiangdu and Dongfeng reservoirs, Guizhou, China. *Environ Pollut* 157: 2970–2984.
24. Han GL, Liu CQ (2004) Water geochemistry controlled by carbonate dissolution: a study of the river waters draining karst-dominated terrain, Guizhou Province, China. *Chem Geo* 204: 1–21.
25. Wang B, Liu CQ, Wu Y (2005) Effect of heavy metals on the activity of external carbonic anhydrase of microalga *Chlamydomonas reinhardtii* and microalgae from karst lakes. *Bull Environ Contam Toxicol* 74: 227–233.
26. Lang YC, Liu CQ, Zhao ZQ, Li SL, Han GL (2006) Geochemistry of surface and ground water in Guiyang, China: Water/rock interaction and pollution in a karst hydrological system. *Appl Geochem* 21: 887–903.
27. He SL, Li CJ, Pan ZP, Luo MX, Meng W, et al. (2012) Geochemistry and environmental quality assessment of Hongfeng Lake sediments, Guiyang. *Geophysical and Geochemical Exploration* 36: 273–297 (in Chinese).
28. Wang Y, Luo TMZ (2001) Geostatistical and geochemical analysis of surface water leakage into groundwater on a regional scale: a case study in the Liulin karst system, northwestern China. *J Hydrol* 246: 223–234.
29. Sophocleous M (2002) Interactions between groundwater and surface water: the state of the science. *Hydrogeol J* 10: 52–67.
30. Feng XB, Foucher D, Hintelmann H, Yan HY, He TR, et al. (2010) Tracing mercury contamination sources in sediments using mercury isotope compositions. *Environ Sci Technol* 44: 3363–3368.
31. Yan HY, Feng XB, Shang LH, Qiu GL, Dai QJ, et al. (2008) The variations of mercury in sediment profiles from a historically mercury-contaminated reservoir, Guizhou province, China. *Sci Total Environ* 407: 497–506.
32. Kaiser HF (1960) The application of electronic computers to factor analysis. *Educ Psychol Measure* 20: 141–151.
33. Liu CW, Lin KH, Kuo YM (2003) Application of factor analysis in the assessment of groundwater quality in a Blackfoot disease area in Taiwan. *Sci Total Environ* 313: 77–89.
34. Macdonald DD, Carr RS, Calder FD, Long ER, Ingersoll CG (1996) Development and evaluation of sediment quality guidelines for Florida coastal waters. *Ecotoxicology* 5: 253–278.
35. Swartz RC (1999) Consensus sediment quality guidelines for PAH mixtures. *Environ Toxicol Chem* 18: 780–787.
36. Long ER, Ingersoll CG, Macdonald DD (2006) Calculation and uses of mean sediment quality guideline quotients: a critical review. *Environ Sci Technol* 40: 1726–1736.
37. He TR, Feng XB, Guo YN, Qiu GL, Li ZG, et al. (2008) The impact of eutrophication on the biogeochemical cycling of mercury species in a reservoir: A case study from Hongfeng Reservoir, Guizhou, China. *Environ Pollut* 154: 56–67.
38. Bai ZG, Wan GJ, Liu TS, Huang RG (2002) A comparative study on accumulation characteristics of <sup>7</sup>Be and <sup>137</sup>Cs in sediments of Lake Erhai and Lake Hongfeng, China. *Geochimica* 31: 113–118 (in Chinese).
39. Huang XF (2008) Studies on characteristics of pollution in sediments from Baihua Lake. Guiyang (in Chinese).
40. Huang XF, Qin FX, Hu JW, Li CX (2008) Characteristic and ecological risk of heavy metal pollution in sediments from Hongfeng Lake. *Res Environ Sci* 21: 18–23 (in Chinese).
41. Zeng Y, Zhang W, Chen JA, Zhu ZJ (2010) Analysis of heavy metal pollution in the sediment of the inflow-lake rivers of the Hongfeng Lake, Earth *Environ* 38: 470–475 (in Chinese).
42. Liu F, Hu JW, Wu D, Qin FX, Li CX, et al. (2011) Speciation characteristics and risk assessment of heavy metals in sediments from Hongfeng Lake, Guizhou Province. *Environmental Chemistry* 30: 440–446 (in Chinese).
43. Tian LF, Hu JW, Luo GL, Ma JJ, Huang XF, et al. (2012) Ecological risk and stability of heavy metals in sediments from Lake Baihua in Guizhou Province. *Acta Scientiae Circumstantiae* 32: 885–894 (in Chinese).
44. NEPA: National Environmental Protection Agency (Presently known as MEP; Ministry of Environmental Protection) (1994) The Atlas of Soil Environmental Background Value in the People's Republic of China. China Environmental Science Press.
45. Hakanson L, Jasson M (1983) Principles of Lake Sedimentology. Springer Verlag, Berlin.
46. Bai JH, Cui BS, Wang QG, Gao HF, Ding QY (2009) Assessment of heavy metal contamination of roadside soils in Southwest China. *Stoch Environ Res Risk Assess* 23: 341–347.
47. Zhu ZM, Li ZG, Bi XY, Han ZX, Yu GH (2013) Response of magnetic properties to heavy metal pollution in dust from three industrial cities in China. *J Hazard Mater* 246–247: 189–198.
48. He TR (2007) Biogeochemical cycling of mercury in Hongfeng Reservoir, Guizhou, China. Guiyang (in Chinese).
49. SEPA: State Environmental Protection Administration (Presently known as MEP; Ministry of Environmental Protection) (2000) Report on the State of the Environment in China. Available: [http://english.mep.gov.cn/SOE/soechina2000/english/atmospheric/atmospheric\\_e.htm](http://english.mep.gov.cn/SOE/soechina2000/english/atmospheric/atmospheric_e.htm).
50. Farkas A, Claudio E, Vigano L (2007) Assessment of the environmental significance of heavy metal pollution in surficial sediments of the River Po. *Chemosphere* 68: 761–768.
